# Supplementary material
Source: Springer Nature journal article supplement (https://www.springermedizin.de/resource/supplementary/13046_2012_562_MOESM11_ESM.pdf/9662454)

# 52 NSCLC patients

ERCC1+BAG-1

Progression-free survival (%)

Negative expression

Positive expression

Time (months)

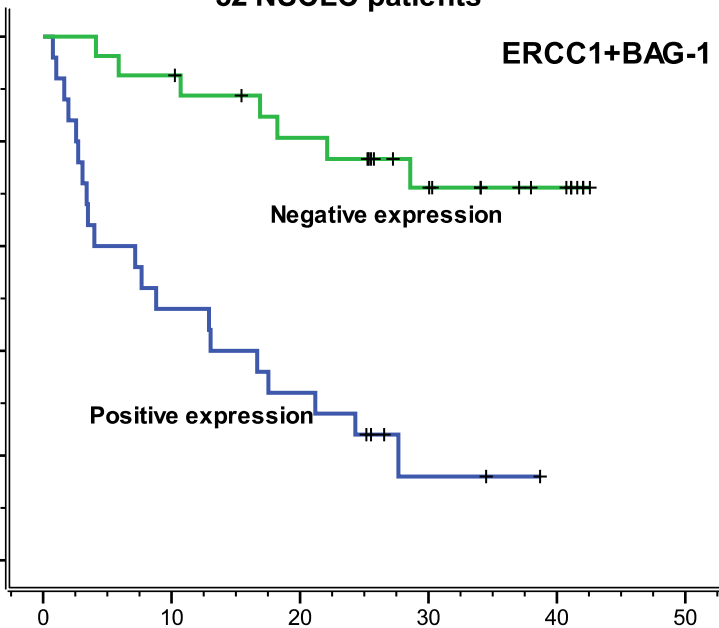

Supplement: MOESM11 [file 9662454]
